# Supplementary material for: Association Between Health Insurance Literacy and Avoidance of Health Care Services Owing to Cost
Source: PubMed Central journal article supplement (PMC6324372; doi:10.1001/jamanetworkopen.2018.4796), 2018-11-16
Supplement: jamanetwopen-1-e184796-s001.pdf [file jamanetwopen-1-e184796-s001.pdf]

## Supplementary Online Content

Tipirneni R, Politi MC, Kullgren JT, Kieffer EC, Goold SD, Scherer AM. Association between health insurance literacy and avoidance of health care services owing to cost. *JAMA Netw Open*. 2018;1(7):e184796. doi:10.1001/jamanetworkopen.2018.4796

**eFigure.** Health Insurance Literacy Measure (HILM) Distribution

**eTable 1.** Prevalence of Delayed or Foregone Services Due to Costs, Participants With and Without High-Deductible Health Plans

**eTable 2.** Bivariate Correlations Between HILM and Demographic and Health Characteristics

**eTable 3.** Health Care Utilization Among Survey Participants, Preventive and Non-Preventive Services

This supplementary material has been provided by the authors to give readers additional information about their work.

eFigure. Health Insurance Literacy Measure (HILM) Distribution

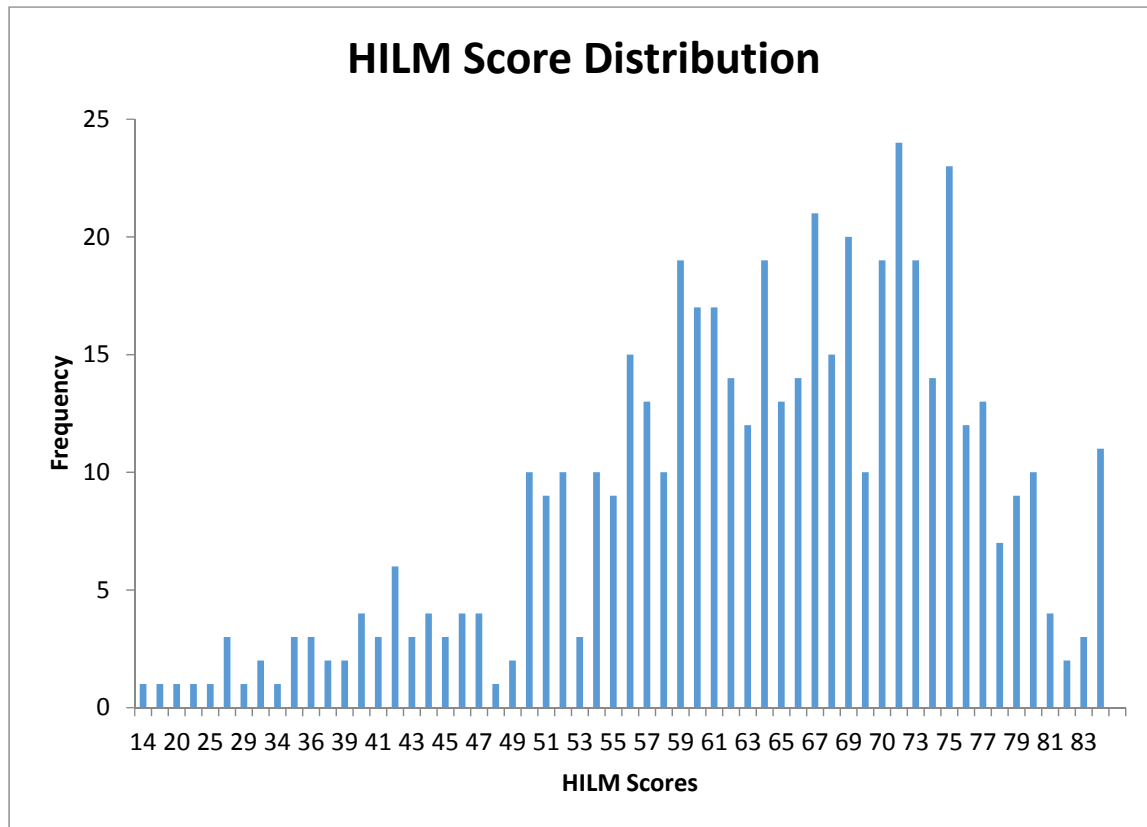

**eTable 1. Prevalence of Delayed or Foregone Services Due to Costs, Participants With and Without High-Deductible Health Plans<sup>a</sup>**

| Type of Care                         | Delayed/Foregone Care, n (%) |                           |                               | p value |
|--------------------------------------|------------------------------|---------------------------|-------------------------------|---------|
|                                      | All Participants (N=506)     | HDHP <sup>b</sup> (n=131) | Non-HDHP <sup>b</sup> (n=375) |         |
| Delayed/Foregone Preventive Care     | <b>80 (15.8)</b>             | 32 (24.4)                 | 48 (12.8)                     | 0.003   |
| Physical                             | 53 (10.5)                    | 22 (16.8)                 | 31 (8.3)                      |         |
| Cholesterol Check                    | 26 (5.1)                     | 11 (8.4)                  | 15 (4.0)                      |         |
| Flu Shot                             | 27 (5.3)                     | 9 (6.9)                   | 18 (4.8)                      |         |
| Colon cancer screening               | 17 (3.4)                     | 10 (7.6)                  | 7                             |         |
| Mammogram                            | 20 (4.0)                     | 10 (7.6)                  | 10 (2.7)                      |         |
| Pap Smear                            | 30 (5.9)                     | 14 (10.7)                 | 16 (4.3)                      |         |
| Delayed/Foregone Non-Preventive Care | <b>76 (15.0)</b>             | 32 (24.4)                 | 44 (11.7)                     | 0.001   |
| Urgent visit                         | 50 (9.9)                     | 25 (19.1)                 | 25 (6.7)                      |         |
| X-ray                                | 13 (2.6)                     | 6 (4.6)                   | 7                             |         |
| MRI                                  | 40 (7.9)                     | 17 (13.0)                 | 23 (6.1)                      |         |

Note: <sup>a</sup>150 (30% of sample) had delayed or foregone care due to cost.

<sup>b</sup>HDHP = High Deductible Health Plan, a type of health insurance plan with a higher amount an individual must pay for health care costs before the insurance plan covers the cost (the deductible). This is defined as more than \$1,300 for an individual or \$2,600 for a family.

**eTable 2. Bivariate Correlations Between HILM and Demographic and Health Characteristics<sup>a</sup>**

|                           | Health insurance literacy | Health literacy  | Numeracy          | Age              | Gender, female   | Race, non-white | Education | Income | HDHP | Chronic conditions |
|---------------------------|---------------------------|------------------|-------------------|------------------|------------------|-----------------|-----------|--------|------|--------------------|
| Health insurance literacy | -                         |                  |                   |                  |                  |                 |           |        |      |                    |
| Health literacy           | 0.04<br>(0.327)           | -                |                   |                  |                  |                 |           |        |      |                    |
| Numeracy                  | 0.19<br>(<0.001)          | -0.07<br>(0.128) | -                 |                  |                  |                 |           |        |      |                    |
| Age                       | 0.07<br>(0.093)           | -0.13<br>(0.004) | 0.11<br>(0.018)   | -                |                  |                 |           |        |      |                    |
| Gender, female            | 0.02<br>(0.610)           | 0.04<br>(0.389)  | -0.17<br>(<0.001) | 0.13<br>(0.004)  | -                |                 |           |        |      |                    |
| Race, non-white           | -0.03<br>(0.523)          | -0.05<br>(0.275) | -0.05<br>(0.304)  | -0.07<br>(0.124) | -0.03<br>(0.486) | -               |           |        |      |                    |
| Education                 | 0.06<br>(0.215)           | -0.02<br>(0.708) | 0.28<br>(<0.001)  | 0.04<br>(0.413)  | 0.01<br>(0.856)  | 0.04<br>(0.366) | -         |        |      |                    |
| Income                    | 0.14                      | -0.01            | 0.19              | 0.07             | -0.04            | -0.01           | 0.32      | -      |      |                    |

|                    |                  |                 |                  |                 |                 |                  |                  |                  |                 |   |
|--------------------|------------------|-----------------|------------------|-----------------|-----------------|------------------|------------------|------------------|-----------------|---|
|                    | (0.001)          | (0.982)         | (<0.001)         | (0.100)         | (0.373)         | (0.807)          | (<0.001)         |                  |                 |   |
| HDHP               | 0.05<br>(0.310)  | 0.05<br>(0.255) | 0.01<br>(0.937)  | 0.01<br>(0.917) | 0.01<br>(0.778) | -0.03<br>(0.469) | 0.12<br>(0.006)  | 0.24<br>(<0.001) | -               |   |
| Chronic conditions | -0.02<br>(0.591) | 0.07<br>(0.097) | -0.09<br>(0.053) | 0.12<br>(0.009) | 0.06<br>(0.186) | -0.12<br>(0.005) | -0.13<br>(0.004) | -0.14<br>(0.002) | 0.02<br>(0.688) | - |

Note: <sup>a</sup>Correlations and *p* values (in parentheses). Cells in grey indicate *p*<0.05. HILM = Health Insurance Literacy Measure; HDHP=High Deductible Health Plan.

**eTable 3. Health Care Utilization Among Survey Participants, Preventive and Non-Preventive Services**

| <b>Health care service in the past 12 months</b>                  | <b>N (%)</b> |
|-------------------------------------------------------------------|--------------|
| <b>Preventive Services</b>                                        |              |
| Flu shot in the past 12 months                                    | 135 (26.7)   |
| Cholesterol check in the past 5 years                             | 301 (59.6)   |
| <i>Any preventive service use (flu shot or cholesterol check)</i> | 326 (64.6)   |
| <b>Non-Preventive Services</b>                                    |              |
| Emergency Room visits (mean 0.18, SD 0.54 visits)                 |              |
| 0                                                                 | 441 (87.2)   |
| ≥1                                                                | 65 (12.8)    |
| Hospital Admissions (mean 0.05, SD 0.24 visits)                   |              |
| 0                                                                 | 483 (95.6)   |
| ≥1                                                                | 22 (4.4)     |
| <i>Any non-preventive service use (ER or inpatient)</i>           | 73 (14.5)    |
